# Supplementary material for: Positive Anti-SSA/Ro Antibody in a Woman with SARS-CoV-2 Infection Using Immunophenotyping: A Case Report
Source: MDPI journal article supplement (doi:10.3390/medicina56100521), 2020-10-05

## Supplementary Table 1

The antibodies of T cell, Treg and B cell panel corresponding to fluorescent dyes

| <b>Laser</b> | <b>Fluorescence dye</b>   | DuraClone IM T cell subsets Tube | DuraClone IM Treg Tube | DuraClone IM B cell Tube |
|--------------|---------------------------|----------------------------------|------------------------|--------------------------|
| <b>488nm</b> | <b>FITC</b>               | CD45RA                           | CD45RA                 | IgD                      |
|              | <b>PE</b>                 | CCR7                             | CD25                   | CD21                     |
|              | <b>ECD</b>                | CD28                             | -                      | CD19                     |
|              | <b>PC5.5</b>              | PD-1                             | CD39                   | PD-1                     |
|              | <b>PC7</b>                | CD27                             | CD4                    | CD27                     |
| <b>638nm</b> | <b>APC</b>                | CD4                              | FoxP3                  | CD24                     |
|              | <b>APC-A700</b>           | CD8                              | CD8*                   | -                        |
|              | <b>APC-A750</b>           | CD3                              | CD3                    | CD38                     |
| <b>405nm</b> | <b>Pacific Blue</b>       | CD57                             | Helios                 | IgM                      |
|              | <b>(PB)</b>               |                                  |                        |                          |
|              | <b>Krome Orange (KrO)</b> | CD45                             | CD45                   | CD45                     |
|              | <b>BV605</b>              | CD95*                            | CD62L*                 | CD95*                    |
|              | <b>BV650</b>              | Tim-3*                           | HLADR*                 | HLADR*                   |
|              | <b>BV780</b>              | KLRG1*                           | CD127*                 | -                        |

\*The antibodies were extra-added in the DuraClone IM kits, each antibody was added 5ul in one reaction.

Supplementary Figure 1. The cell gating of T cell immunophenotyping

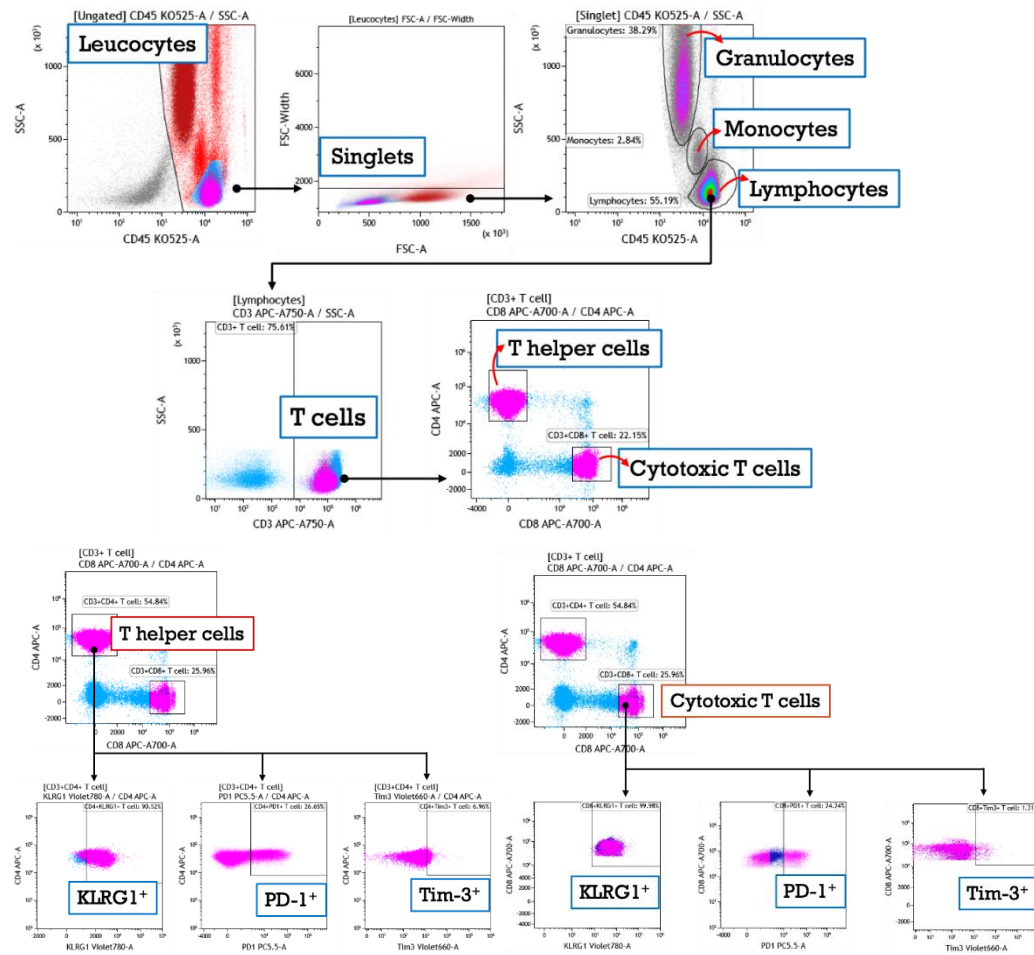

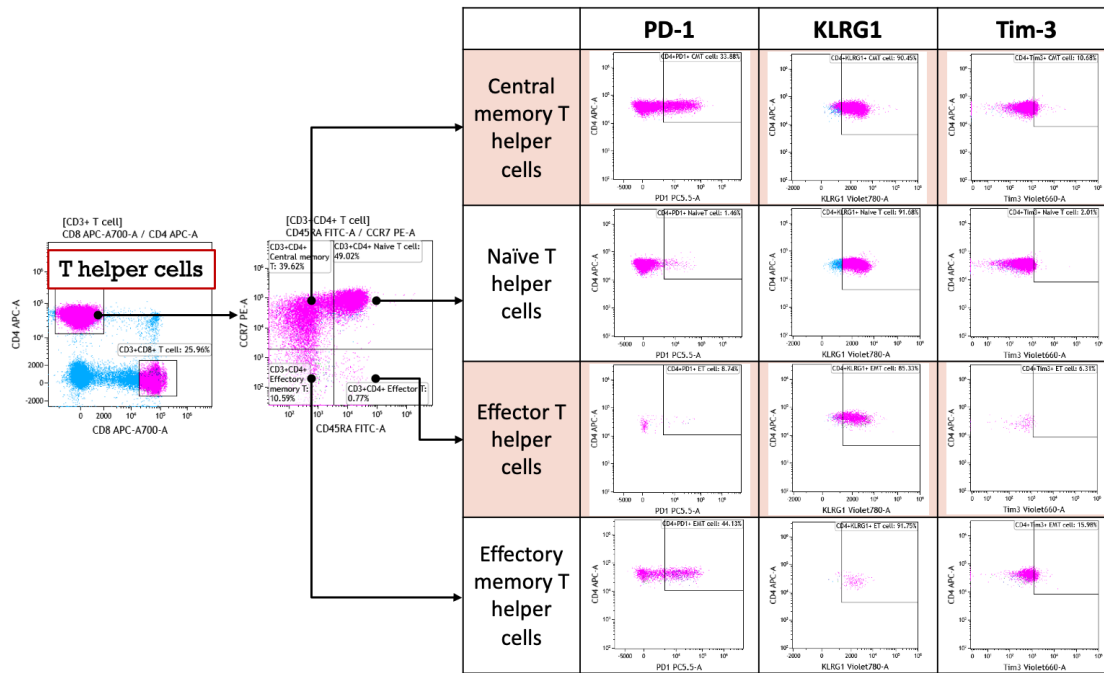

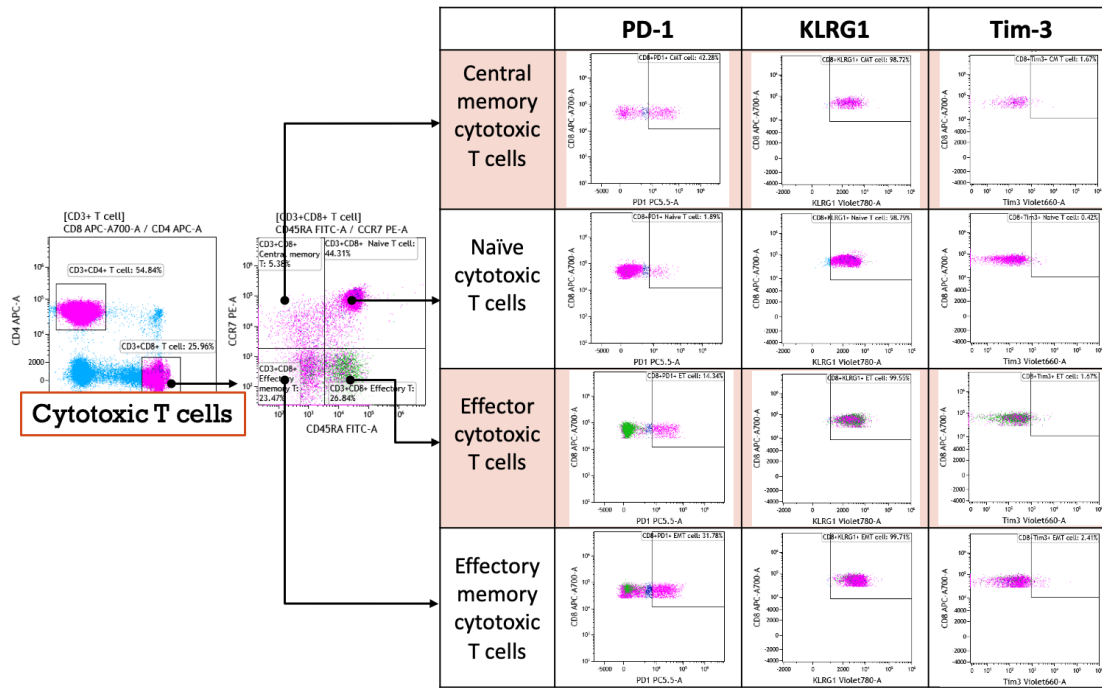

Supplementary Figure 2. The cell gating of Treg cell immunophenotyping

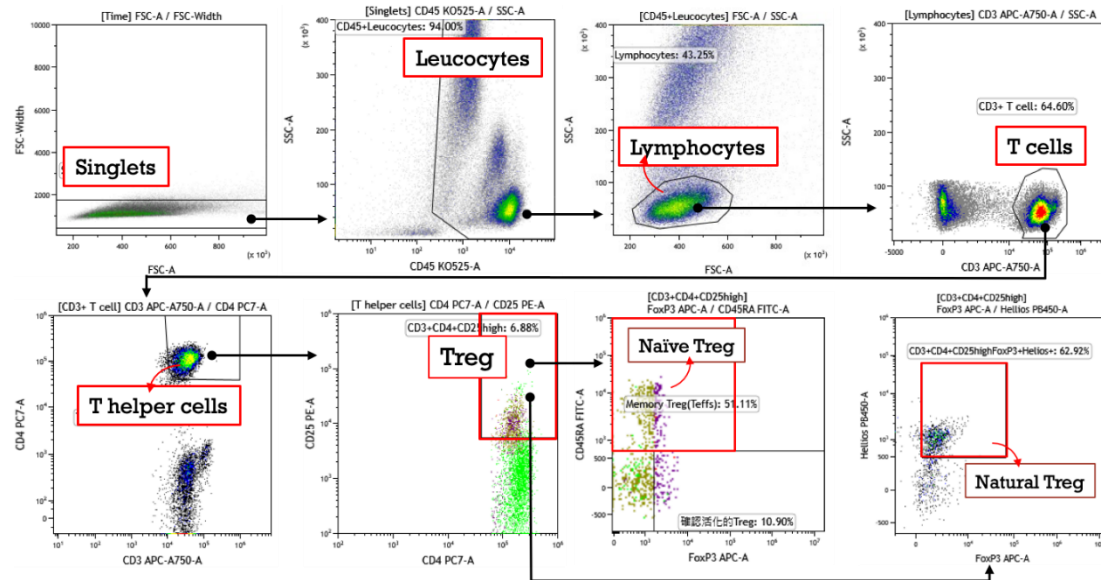

### Supplementary Figure 3. The cell gating of B cell immunophenotyping

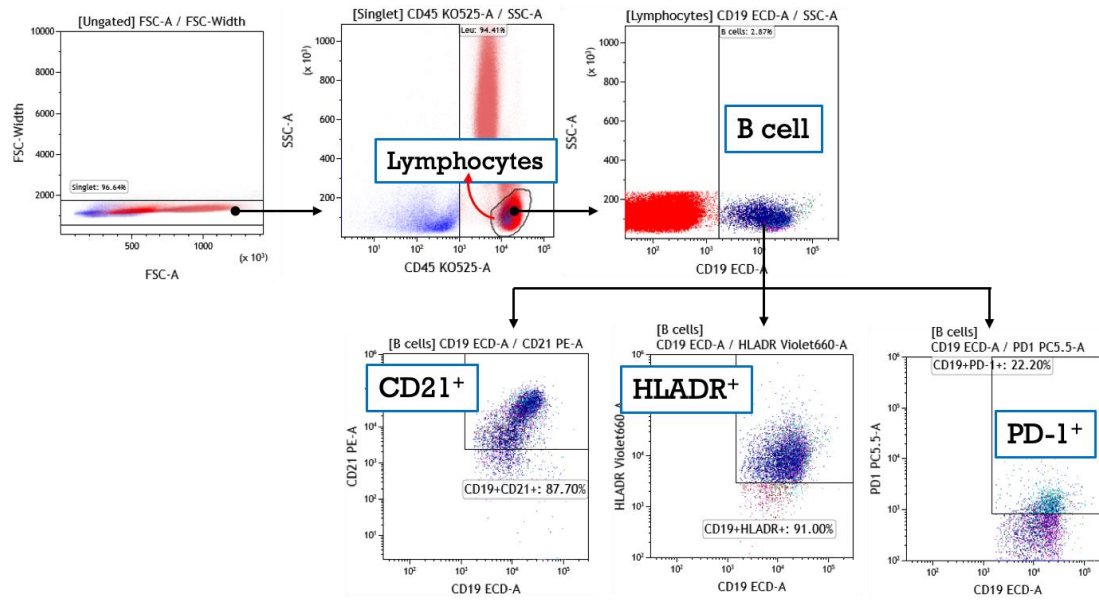

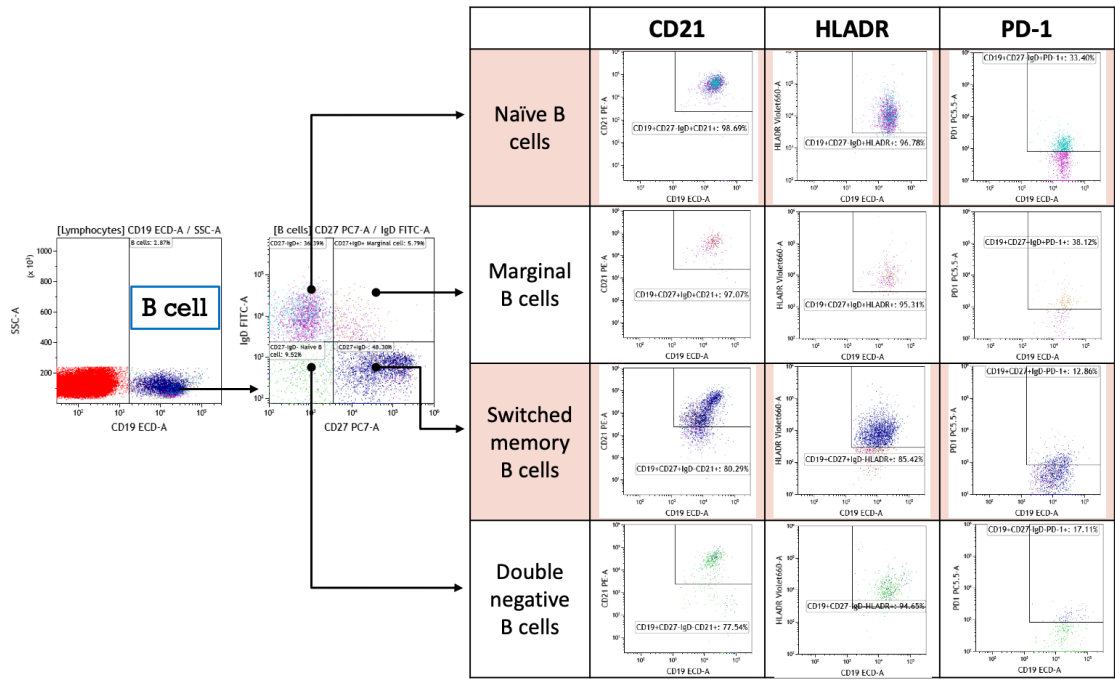

Supplement: s1 [file s1]
